# Supplementary material
Source: PubMed Central journal article supplement (PMC7596680)
Supplement: jamaophthalmol-e204524-s001.pdf [file jamaophthalmol-e204524-s001.pdf]

## Supplemental Online Content

Assi L, Varadaraj V, Shakarchi AF, et al. Association of vision impairment with preventive care use among older adults in the United States. *JAMA Ophthalmol*. Published online October 29, 2020. doi:10.1001/jamaophthalmol.2020.4524

**eTable.** Multivariable-Adjusted Odds Ratios and 95% Confidence Intervals of Preventive Care Services Uptake by Vision Impairment Status

This supplemental material has been provided by the authors to give readers additional information about their work.

**eTable 1 – Multivariable-Adjusted Odds Ratios and 95% Confidence Intervals of Preventive Care Services Uptake by Vision Impairment Status**

| <b>The National Health Interview Survey, 2015 and 2018</b>           |                                                         |
|----------------------------------------------------------------------|---------------------------------------------------------|
|                                                                      | <b>Odds Ratio (95% Confidence Interval)<sup>a</sup></b> |
| <b>Breast Cancer Screening (N=12120)</b>                             |                                                         |
| No vision impairment                                                 | Reference                                               |
| Vision impairment                                                    | 0.83 (0.72, 0.97)                                       |
| <b>Colorectal Cancer Screening (N=22144)</b>                         |                                                         |
| No vision impairment                                                 | Reference                                               |
| Vision impairment                                                    | 0.89 (0.80, 1.00)                                       |
| <b>Influenza Vaccination (N=29654)</b>                               |                                                         |
| No vision impairment                                                 | Reference                                               |
| Vision impairment                                                    | 1.07 (0.98, 1.17)                                       |
| <b>Pneumococcal Vaccination (N=14771)</b>                            |                                                         |
| No vision impairment                                                 | Reference                                               |
| Vision impairment                                                    | 1.03 (0.90, 1.16)                                       |
| <b>The Behavioral Risk Factor Surveillance System, 2016 and 2018</b> |                                                         |
|                                                                      | <b>Odds Ratio (95% Confidence Interval)<sup>b</sup></b> |
| <b>Breast Cancer Screening (N=228640)</b>                            |                                                         |
| No vision impairment                                                 | Reference                                               |
| Vision impairment                                                    | 0.68 (0.60, 0.76)                                       |
| <b>Colorectal Cancer Screening (N=394270)</b>                        |                                                         |
| No vision impairment                                                 | Reference                                               |
| Vision impairment                                                    | 0.72 (0.66, 0.78)                                       |
| <b>Influenza Vaccination (N=530027)</b>                              |                                                         |
| No vision impairment                                                 | Reference                                               |
| Vision impairment                                                    | 0.96 (0.90, 1.02)                                       |
| <b>Pneumococcal Vaccination (N=279618)</b>                           |                                                         |
| No vision impairment                                                 | Reference                                               |
| Vision impairment                                                    | 0.90 (0.81, 0.99)                                       |

<sup>a</sup> Models adjusted for age (50-54, 55-59, 60-64, 65-69, 70-74, 75-79, 80+), sex (except for breast cancer screening), race/ethnicity (non-Hispanic white, non-Hispanic black, Hispanic, non-Hispanic other), income to poverty ratio (<1.00, 1.00-1.99, >2.00), having health insurance (yes, no), having a usual place of care (yes, no), comorbidity count (0, 1-2, 3+ conditions), survey year (2015, 2018).

<sup>b</sup> Models adjusted for age (50-54, 55-59, 60-64, 65-69, 70-74, 75-79, 80+), sex (except for breast cancer screening), race/ethnicity (non-Hispanic white, non-Hispanic black, Hispanic, non-Hispanic other), education (less than high school, high school graduate, some college, college graduate or higher), having health insurance (yes, no), having a usual care provider (yes, no), comorbidity count (0, 1-2, 3+ conditions), survey year (2016, 2018).
